# Supplementary material for: A functional role for semaphorin 4D/plexin B1 interactions in epithelial branching morphogenesis during organogenesis
Source: Oxford University Press journal article supplement (doi:10.1242/dev.019760), 2008-09-18
Supplement: dev019760-sup-019760-tables1.pdf [file dev019760-sup-019760-tables1.pdf]

**Table S1. Quantitative summary of the development of comma-shaped bodies in developing cultured metanephroi over different treatment groups**

| Treatment group      | Number of comma-shaped bodies |
|----------------------|-------------------------------|
| Mock                 | 14.50±1.08                    |
| Sema4d               | 13.00±1.06                    |
| Preimmune serum      | 15.33±1.18                    |
| Anti-Sema4d          | 14.00±1.12                    |
| Mock                 | 18.25±1.58                    |
| Mock + K252a         | 13.25±0.80*                   |
| Sema4d               | 12.45±1.06                    |
| Sema4d + K252a       | 13.18±0.88                    |
| Mock                 | 13.58±1.38                    |
| Mock + 1 µM Y27632   | 13.69±0.89                    |
| Mock + 3 µM Y27632   | 11.33±1.06                    |
| Sema4d               | 13.00±1.07                    |
| Sema4d + 1 µMY27632  | 14.57±5.50                    |
| Sema4d + 3 µM Y27632 | 11.44±1.26                    |

\* $P < 0.05$ , Student's *t*-test.
