# Supplementary figures and images for: A functional role for semaphorin 4D/plexin B1 interactions in epithelial branching morphogenesis during organogenesis
Source: Oxford University Press journal article supplement (doi:10.1242/dev.019760), 2008-09-18

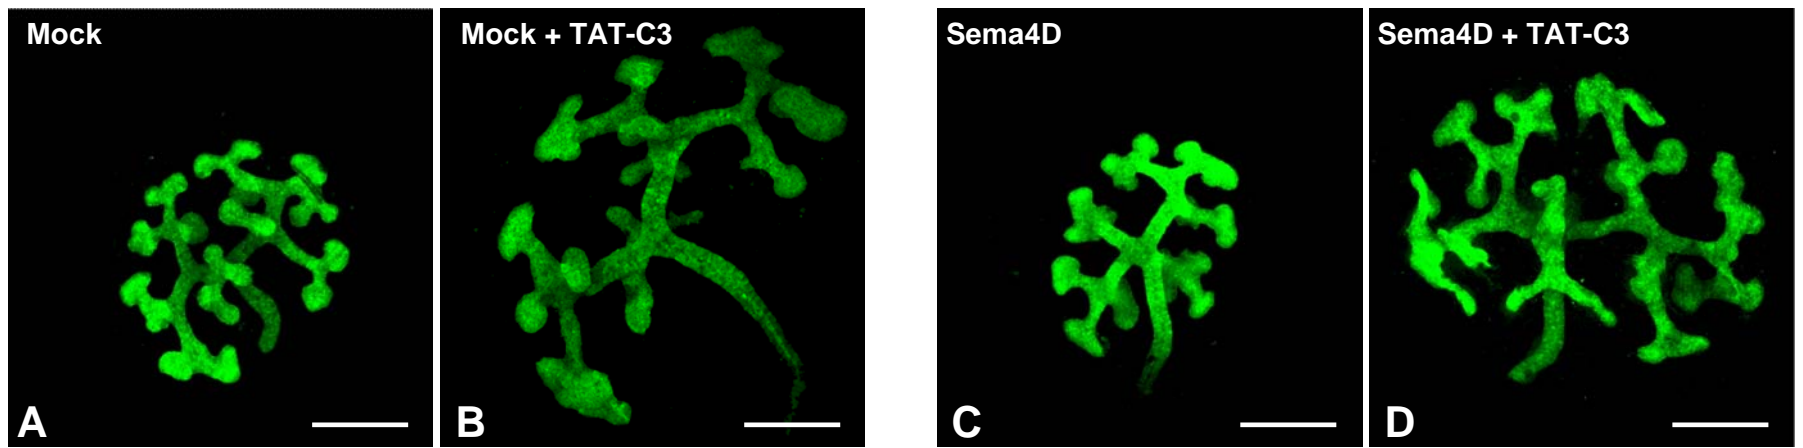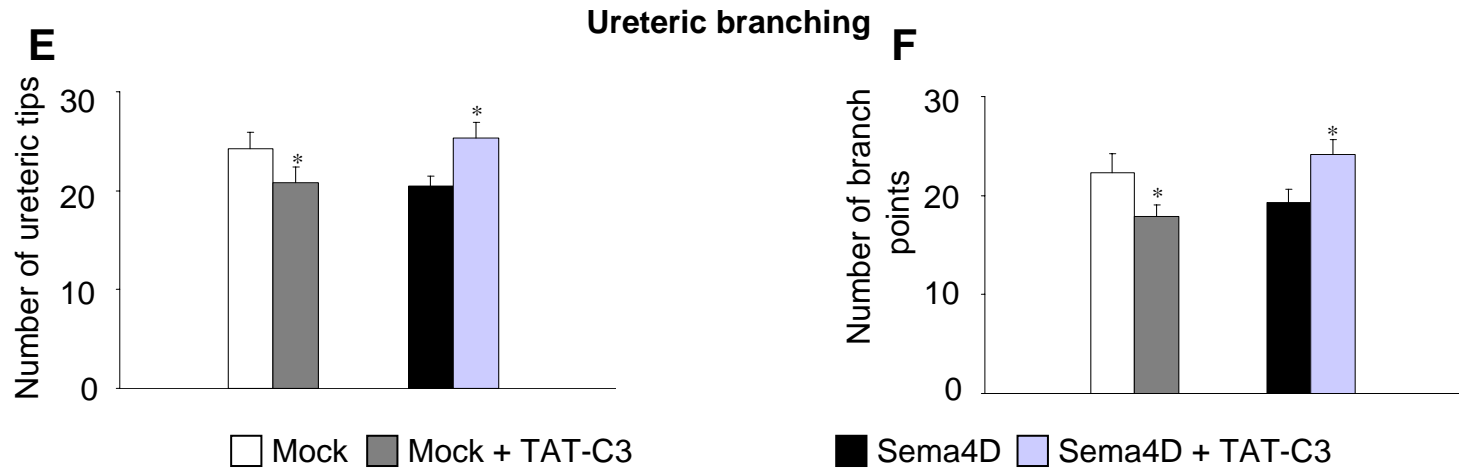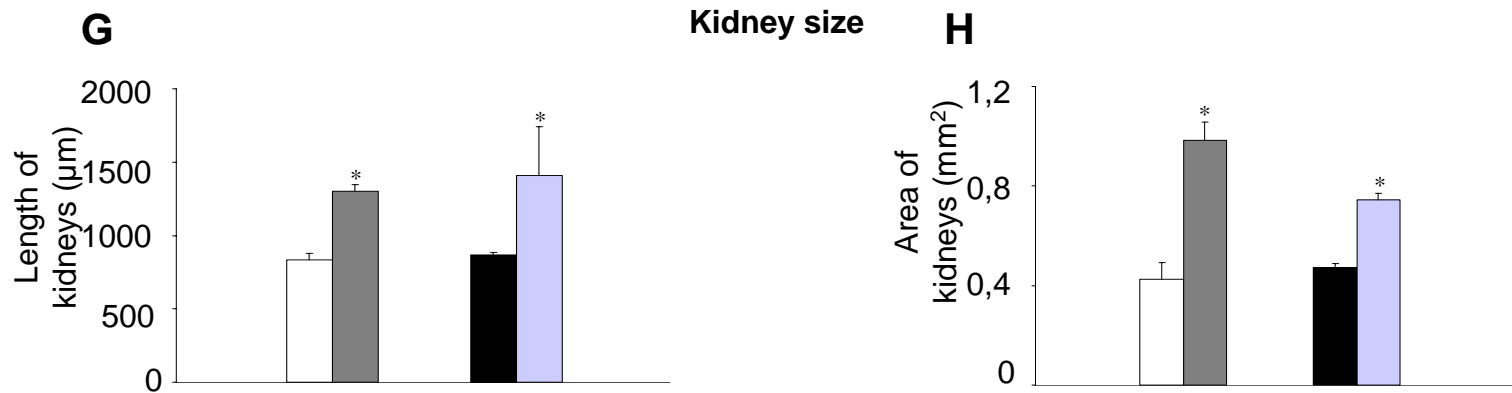

Supplement: dev019760-sup-019760-figs1.pdf [file dev019760-sup-019760-figs1.pdf]
